# Supplementary material for: Immobilized antimony species on magnetite: a novel and highly efficient magnetically reusable nanocatalyst for direct and gram-scale reductive-coupling of nitroarenes to azoarenes
Source: Royal Society of Chemistry journal article supplement (doi:10.1039/c9ra01249d), 2019-01-01

(Supporting Information)

**The Immobilized Antimony Species on Magnetite: a Novel and Highly Efficient Magnetically Reusable Nanocatalyst for Direct and Gram Scale Reductive-Coupling of Nitroarenes to Azoarenes**

Behzad Zeynizadeh\* and Fariba Faraji

Department of Chemistry, Faculty of Science, Urmia University, Urmia 5756151818, Iran  
E-mail: bzeynizadeh@gmail.com

(Table 3, entry 1: Mass spectra 70 eV, Azobenzene)

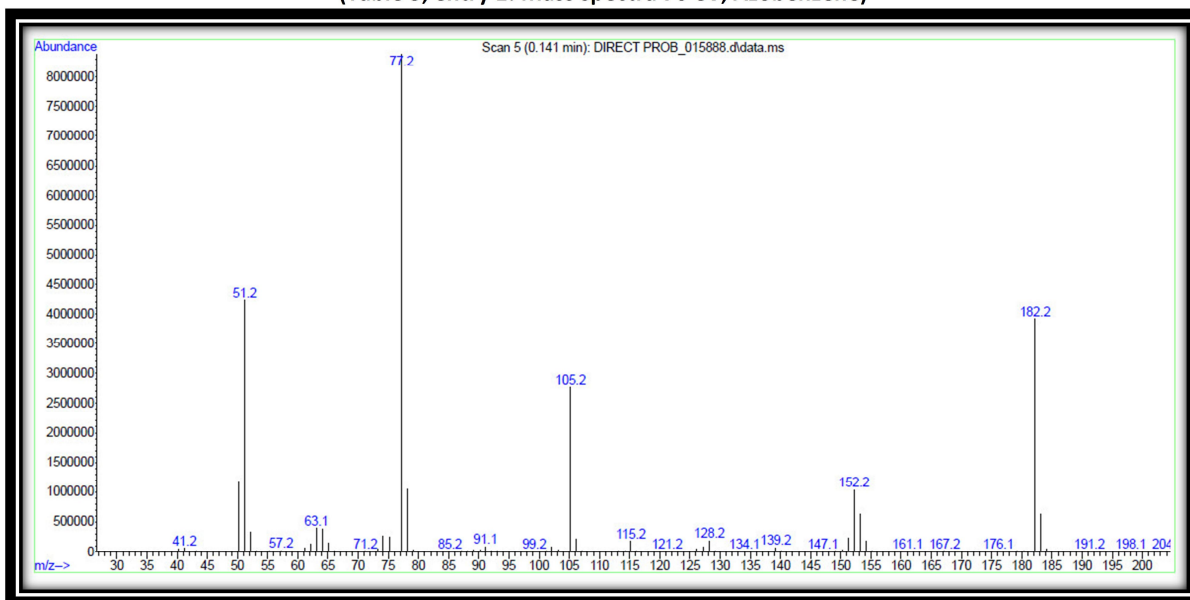

(Table 3, entry 1: <sup>1</sup>H NMR 300 MHz, Azobenzene)

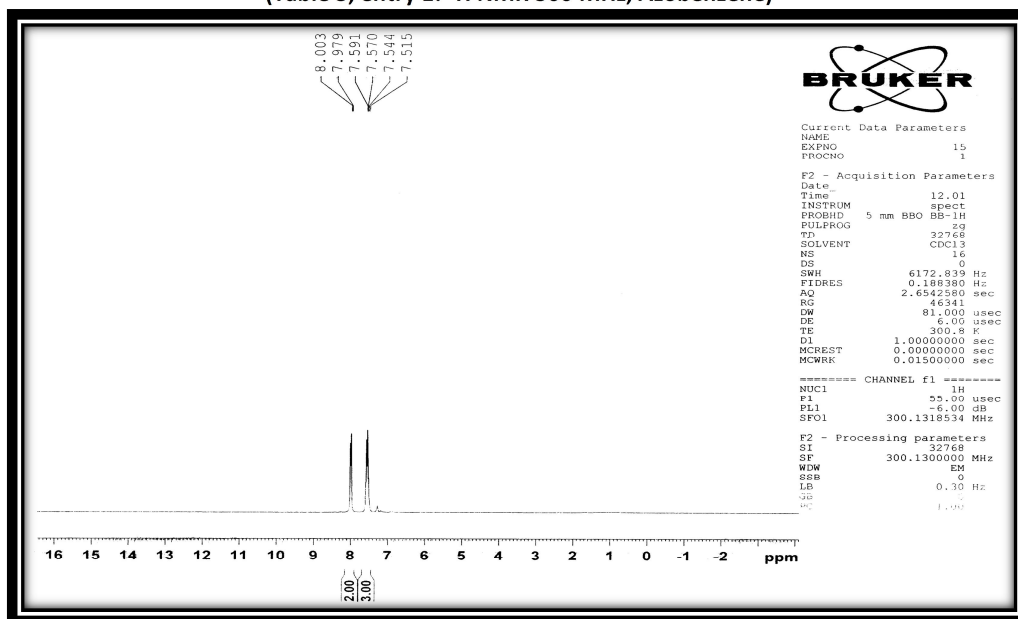

(Table 3, entry 1: FT-IR, Azobenzene)

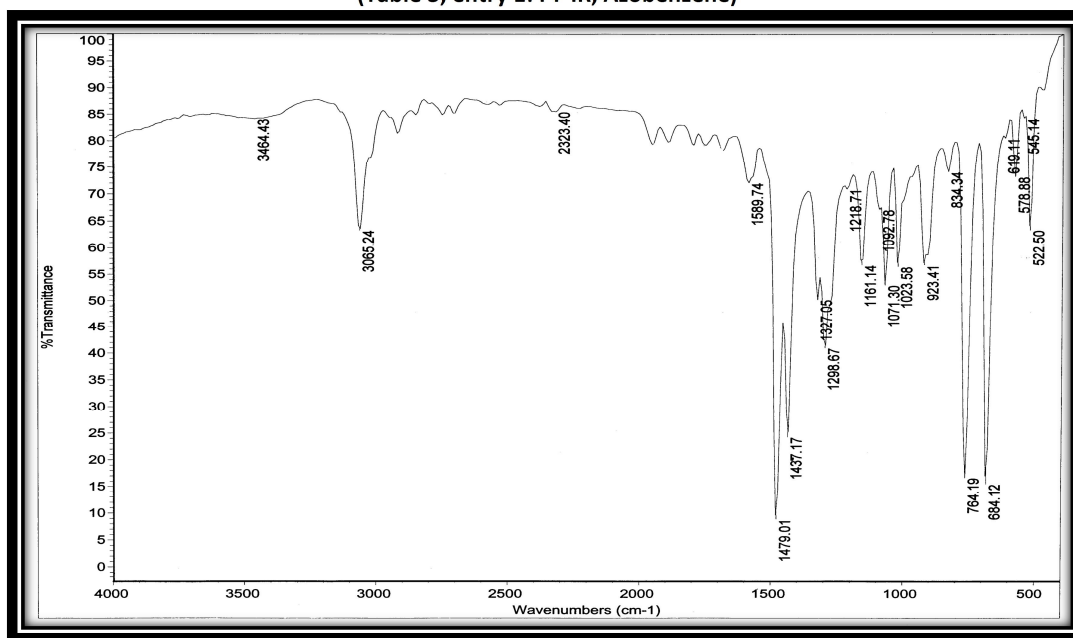

(Table 3, entry 2: <sup>1</sup>H NMR 300 MHz, 2,2'-Dimethylazobenzene)

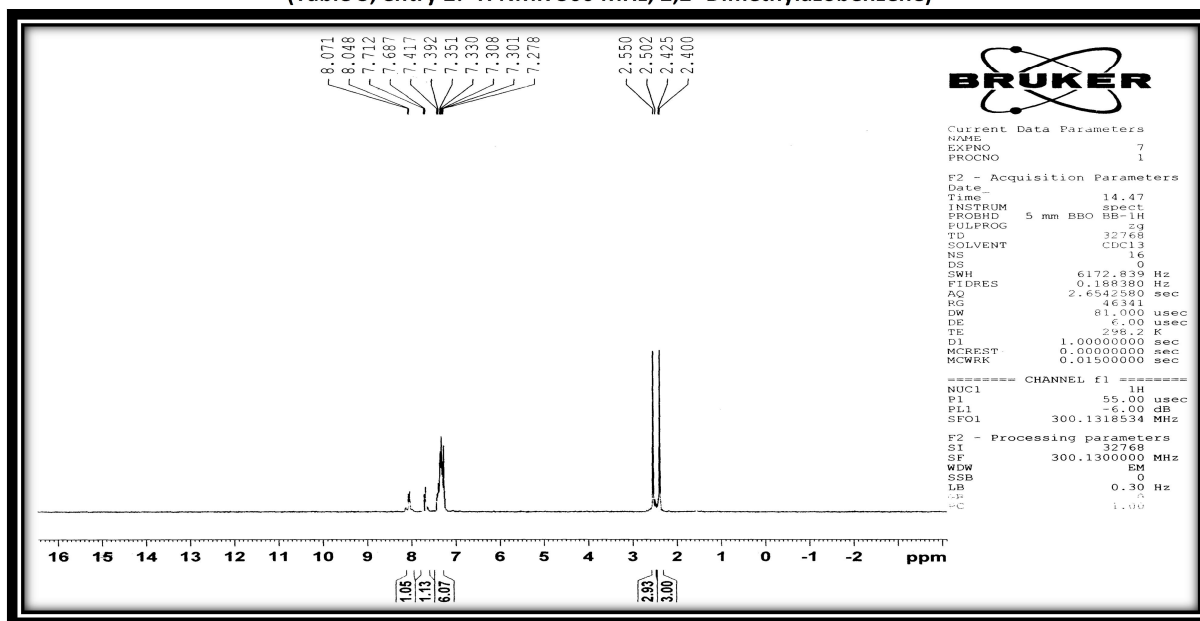

(Table 3, entry 2: FT-IR, 2,2'-Dimethylazobenzene)

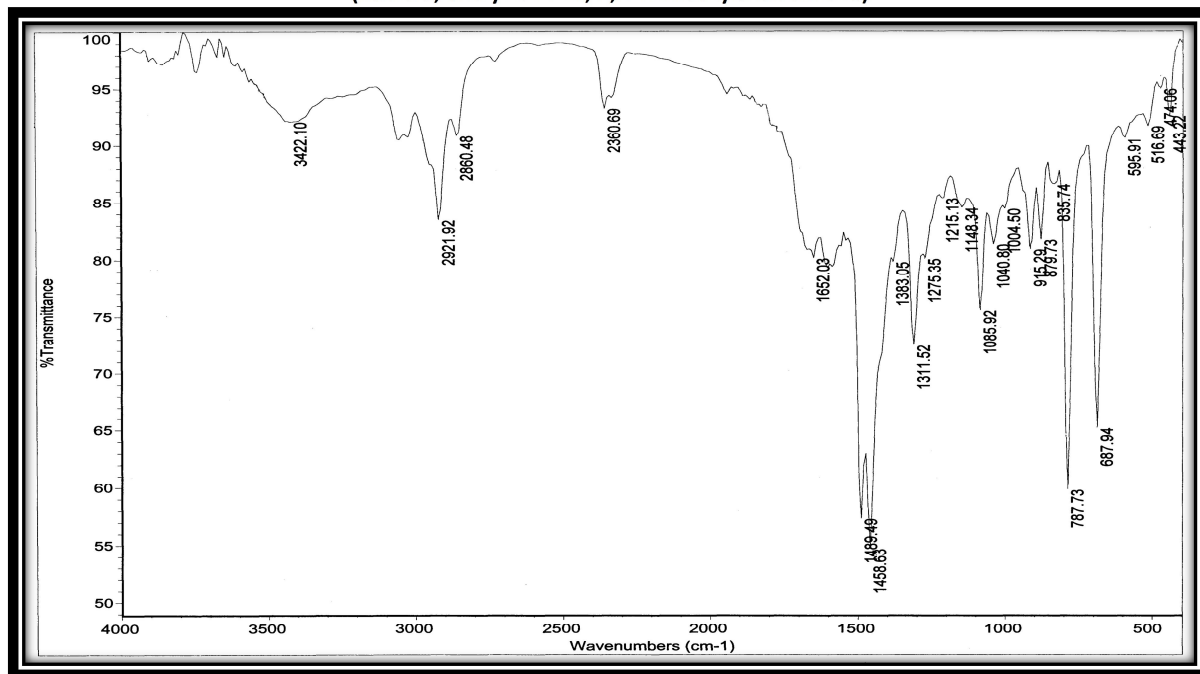

(Table 3, entry 3: Mass spectra 70 eV, 3,3'-Dimethylazobenzene)

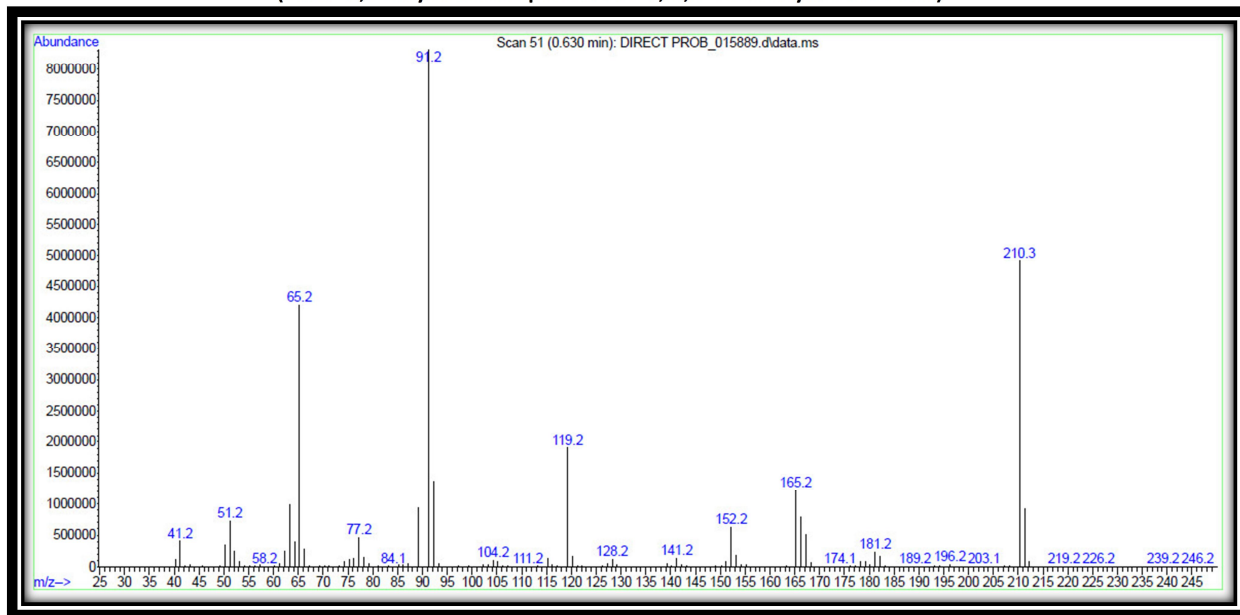

(Table 3, entry 3:  $^1\text{H}$  NMR 300 MHz, 3,3'-Dimethylazobenzene)

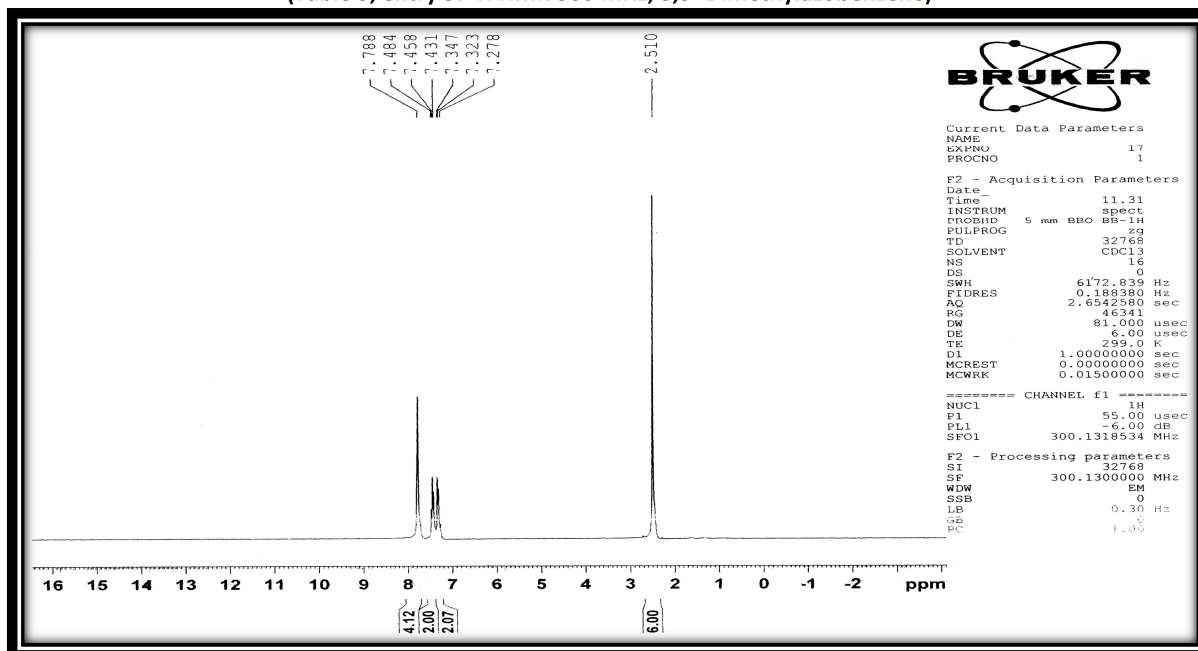

(Table 3, entry 3: FT-IR, 3,3'-Dimethylazobenzene)

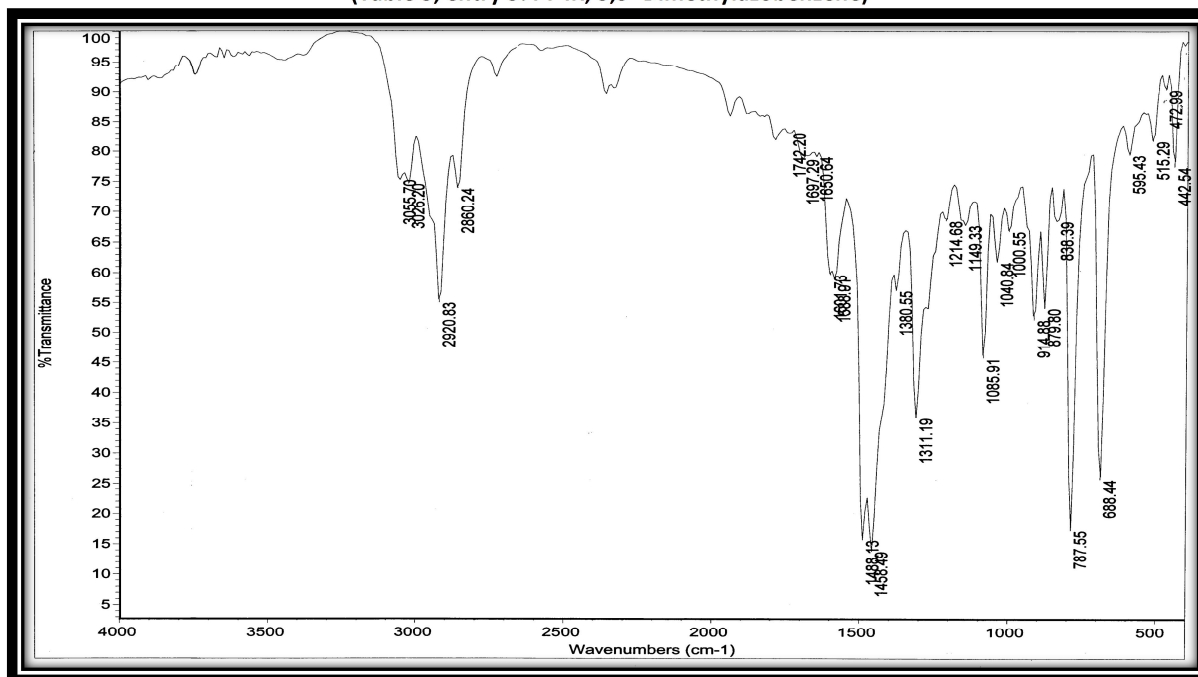

(Table 3, entry 4:  $^1\text{H}$  NMR 300 MHz, 4,4'-Dimethylazobenzene)

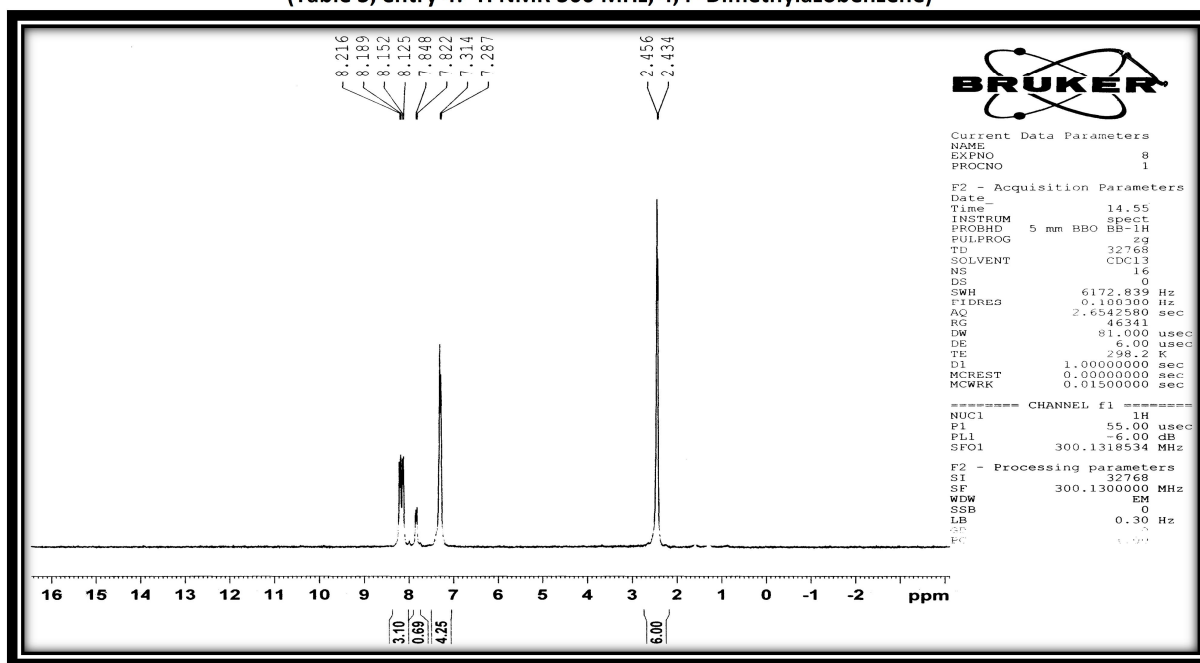

(Table 3, entry 4: FT-IR, 4,4'-Dimethylazobenzene)

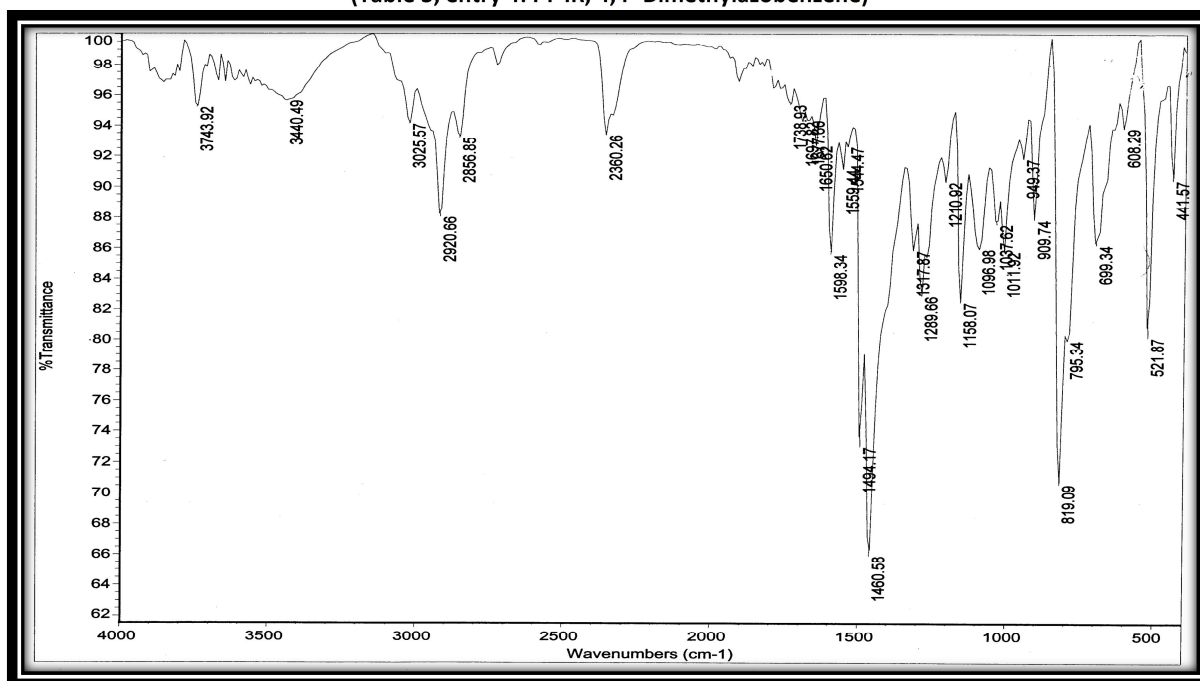

Supplement: c9ra01249d1.pdf [file c9ra01249d1.pdf]
